# Supplementary material
Source: Springer Nature journal article supplement (https://www.springermedizin.de/resource/supplementary/12943_2014_1385_MOESM4_ESM.pdf/9552860)

Figure S4

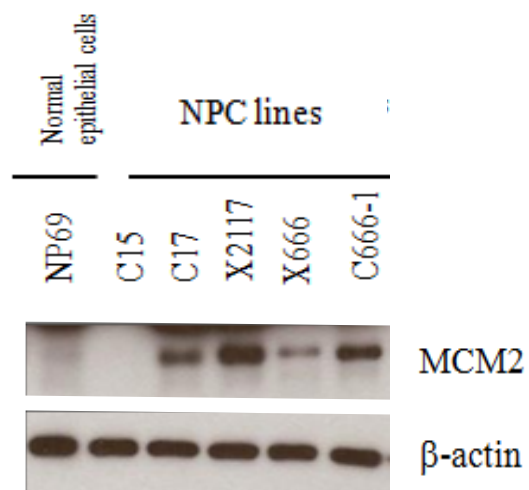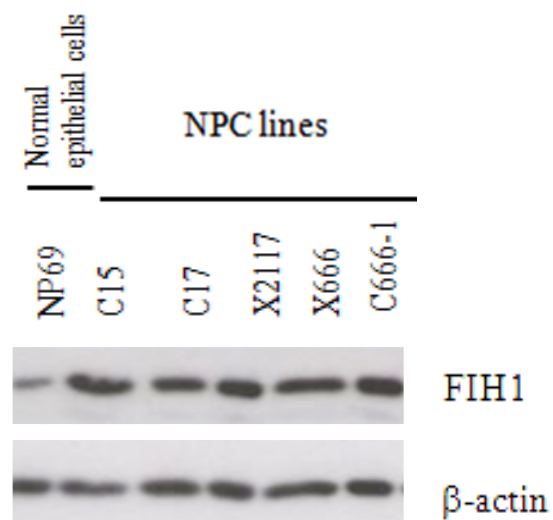

Supplement: MOESM4 [file 9552860]
